# Supplementary material for: Multi-Mechanistic and Therapeutic Exploration of Nephroprotective Effect of Traditional Ayurvedic Polyherbal Formulation Using In Silico, In Vitro and In Vivo Approaches
Source: MDPI journal article supplement (doi:10.3390/biomedicines11010168), 2023-01-09
Supplement: s1 [file s1]

**Table S1:** Composition of NEERI KFT and their ethnopharmacological claim for kidney/urinary, urolithiatic disorder via immunomodulation and anti-inflammatory by API, UPI, Unani texts, and reports of current evidences.

| Sr.No | Common name | Botanical name and source         | Concentration (mg) | Traditional claim                                                                                        |                                                              |                                             |
|-------|-------------|-----------------------------------|--------------------|----------------------------------------------------------------------------------------------------------|--------------------------------------------------------------|---------------------------------------------|
|       |             |                                   |                    | API                                                                                                      | UPI                                                          | Current Evidences                           |
| 1.    | Punernava   | <i>Boerhavia diffusa</i> L., root | 1000               | Mutrala (Diuretic), Vatakantaka/sothahara (Anti-inflammation) API, Part-I, Vol-I, V & IX, 140, 211 & 103 |                                                              | (Mishra et al., 2014), (Singh et al., 2020) |
| 2.    | Kasni       | <i>Cichorium intybus</i> L., stem | 600                | -                                                                                                        | Mudir-e-Baul (Diuretic) UPI, Part-I Vol-VI 96                | (Bahmani et al., 2015)                      |
| 3.    | Makoya      | <i>Solanum nigrum</i> L., fruit   | 500                | Prameha (Urinary disorder/ increased frequency and turbidity of urine) API, Part-I, Vol-II, 68           | Muhallil-e-auram (Anti-inflammatory) UPI, Part-I, Vol-VI, 93 | (Azarkish et al., 2017)                     |

|    |            |                                                  |     |                                                                                                                              |                                                                                            |                             |
|----|------------|--------------------------------------------------|-----|------------------------------------------------------------------------------------------------------------------------------|--------------------------------------------------------------------------------------------|-----------------------------|
| 4. | Giloe      | <i>Tinospora cordifolia</i> (Willd.) Miers, stem | 500 | Prameha (Urinary disorder/ increased frequency and turbidity of urine)<br>API, Part-I, Vol-I, 41                             | Mudirr-e-Baul (Diuretic)<br>UPI, Part-I, Vol-I, 31                                         | (Singh and Chaudhuri, 2017) |
| 5. | Kamal fool | <i>Nelumbo nucifera</i> Gaertn., flower          | 400 | Mutra virajaniya (Urinary depigmenter)<br>API, Part-I, Vol-II, 70                                                            |                                                                                            | (Sharma et al., 2020)       |
| 6. | Palash     | <i>Butea monosperma</i> (Lam.) Taub., flower     | 300 | Mutrakrcchra (Dysuria) and Prameha (Urinary disorder/ increased frequency and turbidity of urine)<br>API, Part-I, Vol-V, 162 | Mudirr-e-Baul (Diuretic)<br>UPI, Part-I Vol-II, 83                                         | (Singh et al., 2020)        |
| 7. | Gokshru    | <i>Tribulus terrestris</i> L., fruit             | 300 | Mutrakrcchra (Dysuria)<br>API, Part-I, Vol-1, 40                                                                             | Mudirr-e-Baul (Diuretic),<br>Mufattit-e-Hasat (anti-lithotriptic)<br>UPI, Part-I Vol-I, 53 | (Kaushik et al., 2019)      |

|     |             |                                                                        |     |                                                                                                           |                                                                                                           |                                         |
|-----|-------------|------------------------------------------------------------------------|-----|-----------------------------------------------------------------------------------------------------------|-----------------------------------------------------------------------------------------------------------|-----------------------------------------|
| 8.  | Sirisa      | <i>Albizia lebbbeck</i><br>(L.) Benth., stem                           | 200 | -                                                                                                         |                                                                                                           | (Ahmed et al.,<br>2014)                 |
| 9.  | Lal chandan | <i>Pterocarpus</i><br><i>santalinus</i> L.f.,<br>stem                  | 200 | -                                                                                                         | Bol-ud-<br>dam(Heamaturia)<br>Tanqueehul<br>Mufradat<br>(Tanqueehul<br>mufradat, Pg-169)                  | (Bulle et al., 2016)                    |
| 10. | Haridra     | <i>Curcuma longa</i><br>L., rhizome                                    | 200 | Prameha (Urinary<br>disorder/ increased<br>frequency and turbidity<br>of urine)<br>API, Part-I, Vol-I, 61 | Muhallil-e-Auram<br>(Anti-<br>inflammatory)<br>Tanqueehul<br>Mufradat<br>(Tanqueehul<br>mufradat, Pg-108) | (Ghosh et al.,<br>2014)                 |
| 11. | Ushira/Khas | <i>Vetiveria</i><br><i>zizanioides</i> (L.)<br>Nash, stem              | 150 | Mutrakrechra (Dysuria)<br>API, Part-I, Vol-III, 221                                                       |                                                                                                           |                                         |
| 12. | Aanantmool  | <i>Hemidesmus</i><br><i>indicus</i> (L.) R.<br>Br. ex Schult.,<br>stem | 150 | Raktavikara (Blood<br>detoxification)<br>API, Part-I, Vol-I, 107                                          |                                                                                                           | (Sandeep and<br>Krishnan Nair,<br>2010) |

|     |              |                                         |     |                                                                            |                                                             |                          |
|-----|--------------|-----------------------------------------|-----|----------------------------------------------------------------------------|-------------------------------------------------------------|--------------------------|
| 13. | Dhania       | <i>Coriandrum sativum</i> L., fruit     | 100 | Mutrala (Diuretic) API, Part-I, Vol-I, 31                                  | Muhallil-e-waram (Anti-inflammatory) UPI, Part I, Vol-I, 57 | (Lakhera et al., 2015)   |
| 14. | Sigru        | <i>Moringa oleifera</i> Lam., seed      | 100 | Mutrasarkara (Normalization of glucose in urine), API, Part-I, Vol-IV, 111 |                                                             | (Akinrinde et al., 2020) |
| 15. | Varun        | <i>Crataeva nurvala</i> Buch. Ham. stem | 100 | Raktavikara (Disorders of blood) API, Part-I, Vol-VI, 87                   |                                                             | (Sharma et al., 2020)    |
| 16. | Chaulai      | <i>Amaranthus spinosus</i> L. seed      | 100 | -                                                                          |                                                             | (Amuthan et al., 2012)   |
| 17. | Revand chini | <i>Rheum emodi</i> Wall., rhizome       | 100 | -                                                                          | Mudirr-e-Baul(Diuretic) UPI, Part-I, Vol-II, 92             | (Alam et al., 2005)      |

|     |            |                                                     |     |                                                             |                                                              |                           |
|-----|------------|-----------------------------------------------------|-----|-------------------------------------------------------------|--------------------------------------------------------------|---------------------------|
| 18. | Kakri Beej | <i>Cucumis<br/>utilissimus/melo</i><br>Roxb., seeds | 100 | Mutrakrechra (Dysuria)<br>API, Part-I, Vol-II, 39           | Mudirr-e-Baul<br>(Diuretic)<br>UPI, Part-I,<br>Vol-IV,<br>64 | (Saleem et al.,<br>2019)  |
| 19. | Papita Jad | <i>Carica papaya</i><br>L., root                    | 50  | Mutraroga (Urinary<br>diseases),<br>API, Part-I, Vol-VI, 89 |                                                              | (Naggayi et al.,<br>2015) |

## References

- Ahmed, D., Kumar, V., Verma, A., Gupta, P.S., Kumar, H., Dhingra, V., Mishra, V., Sharma, M., 2014. Antidiabetic, renal/hepatic/pancreas/cardiac protective and antioxidant potential of methanol/dichloromethane extract of Albizzia Lebbeck Benth. stem bark (ALEx) on streptozotocin induced diabetic rats. BMC Complement. Altern. Med. 14, 243.  
<https://doi.org/10.1186/1472-6882-14-243>
- Akinrinde, A.S., Oduwale, O., Akinrinmade, F.J., Bolaji-Alabi, F.B., 2020. Nephroprotective effect of methanol extract of moringa oleifera leaves on acute kidney injury induced by ischemia-reperfusion in rats. Afr. Health Sci. 20, 1382–1396.
- Alam, M.M.A., Javed, K., Jafri, M.A., 2005. Effect of Rheum emodi (Revand Hindi) on renal functions in rats. J. Ethnopharmacol. 96, 121-125.
- Amuthan, A., Chogtu, B., Bairy, K.L., Sudhakar, Prakash, M., 2012. Evaluation of diuretic activity of Amaranthus spinosus Linn. aqueous extract in Wistar rats. J. Ethnopharmacol. 140, 424-427.

- Azarkish, F., Hashemi, K., Talebi, A., Kamalinejad, M., Soltani, N., Pouladian, N., 2017. Effect of the administration of *Solanum nigrum* fruit on prevention of diabetic nephropathy in streptozotocin-induced diabetic rats. *Pharmacognosy Res.* [https://doi.org/10.4103/pr.pr\\_47\\_17](https://doi.org/10.4103/pr.pr_47_17)
- Bahmani, M., Shahinfard, N., Rafieian-Kopaei, M., Saki, K., Shahsavari, S., Taherikalani, M., Ghafourian, S., Baharvand-Ahmadi, B., 2015. Chicory: A review on ethnobotanical effects of *Cichorium intybus* L. *J. Chem. Pharm. Sci.* ISSN:0974-2115
- Bulle, S., Reddy, V.D., Hebbani, A.V., Padmavathi, P., Challa, C., Puvvada, P.K., Repalle, E., Nayakanti, D., Aluganti Narasimhulu, C., Nallanchakravarthula, V., 2016. Nephro-protective action of *P. santalinus* against alcohol-induced biochemical alterations and oxidative damage in rats. *Biomed. Pharmacother.* 84, 740-746.
- Ghosh, S.S., Gehr, T.W.B., Ghosh, S., 2014. Curcumin and chronic kidney disease (CKD): Major mode of action through stimulating endogenous intestinal alkaline phosphatase. *Molecules.* 19, 20139-20156.
- Kaushik, J., Tandon, S., Bhardwaj, R., Kaur, T., Singla, S.K., Kumar, J., Tandon, C., 2019. Delving into the Antiuro lithiatic Potential of *Tribulus terrestris* Extract Through –In Vivo Efficacy and Preclinical Safety Investigations in Wistar Rats. *Sci. Rep.* 9, 1-3.
- Lakhera, A., Ganeshpurkar, A., Bansal, D., Dubey, N., 2015. Chemopreventive role of *Coriandrum sativum* against gentamicin-induced renal histopathological damage in rats. *Interdiscip. Toxicol.* 8, 99-102.
- Mishra, S., Aeri, V., Gaur, P.K., Jachak, S.M., 2014. Phytochemical, therapeutic, and ethnopharmacological overview for a traditionally important herb: *Boerhavia diffusa* linn. *Biomed Res. Int.* 2014, 808302.
- Naggayi, M., Mukiibi, N., Iliya, E., 2015. The protective effects of aqueous extract of carica papaya seeds in paracetamol induced nephrotoxicity in male wistar rats. *Afr. Health Sci.* 15, 598-605.
- Saleem, M., Javed, F., Asif, M., Baig, M.K., Arif, M., 2019. HPLC analysis and in vivo renoprotective evaluation of hydroalcoholic extract of cucumis melo seeds in gentamicin-induced renal damage. *Med.* 55, 107.
- Sandeep, D., Krishnan Nair, C.K., 2010. Amelioration of cisplatin-induced nephrotoxicity by extracts of *Hemidesmus indicus* and *Acorus calamus*. *Pharm. Biol.* 48, 290-295.

- Sharma, S., Baboota, S., Amin, S., Mir, S.R., 2020. Ameliorative effect of a standardized polyherbal combination in methotrexate-induced nephrotoxicity in the rat. *Pharm. Biol.* 58, 184-199.
- Singh, B., Singh, Bikarma, Kishor, A., Singh, S., Bhat, M.N., Surmal, O., Musarella, C.M., 2020. Exploring plant-based ethnomedicine and quantitative ethnopharmacology: Medicinal plants utilized by the population of Jasrota Hill in Western Himalaya. *Sustain.* 12, 7526.
- Singh, D., Chaudhuri, P.K., 2017. Chemistry and pharmacology of *Tinospora cordifolia*, in: *Natural Product Communications*. 12, 1934578X1701200240.

**Table S2:** Potential genes showing interaction with metabolites of NEERI KFT.

| <b>Sr. no.</b> | <b>gene name</b> | <b>protein name</b>                                      | <b>uniport id</b> |
|----------------|------------------|----------------------------------------------------------|-------------------|
| 1.             | Casp7            | Caspase-7                                                | P55210            |
| 2.             | CASP3            | Caspase-3                                                | P42574            |
| 3.             | BCL2             | Bcl-2-related protein A1                                 | Q16548            |
| 4.             | BAAT             | Bile acid-CoA:amino acid N-acyltransferase               | Q14032            |
| 5.             | CDH11            | Cadherin-11                                              | P55287            |
| 6.             | UGT1A7           | UDP-glucuronosyltransferase 1A7                          | Q9HAW7            |
| 7.             | TP53             | Cellular tumor antigen p53                               | P04637            |
| 8.             | CHUK             | Inhibitor of nuclear factor kappa-B kinase subunit alpha | O15111            |
| 9.             | MAPK3            | Mitogen-activated protein kinase 3                       | P27361            |
| 10.            | UGT1A3           | UDP-glucuronosyltransferase 1A3                          | P35503            |
| 11.            | MMP2             | 72 kDa type IV collagenase                               | P08253            |
| 12.            | GATA3            | Trans-acting T-cell-specific transcription factor GATA-3 | P23771            |



|     |       |                                      |        |
|-----|-------|--------------------------------------|--------|
| 13. | MAPK1 | Mitogen-activated protein kinase 1   | P28482 |
| 14. | MMP3  | Stromelysin-1                        | P08254 |
| 15. | HNF4A | Hepatocyte nuclear factor 4-alpha    | P41235 |
| 16. | MMP9  | Matrix metalloproteinase-9           | P14780 |
| 17. | SOD1  | Superoxide dismutase [Cu-Zn]         | P00441 |
| 18. | AGTR1 | Type-1 angiotensin II receptor       | P30556 |
| 19. | ACE2  | Angiotensin-converting enzyme 2      | Q9BYF1 |
| 20. | PRKCA | Protein kinase C alpha type          | P17252 |
| 21. | IL6   | Interleukin-6 receptor subunit alpha | P08887 |
| 22. | JUN   | Transcription factor Jun             | P05412 |

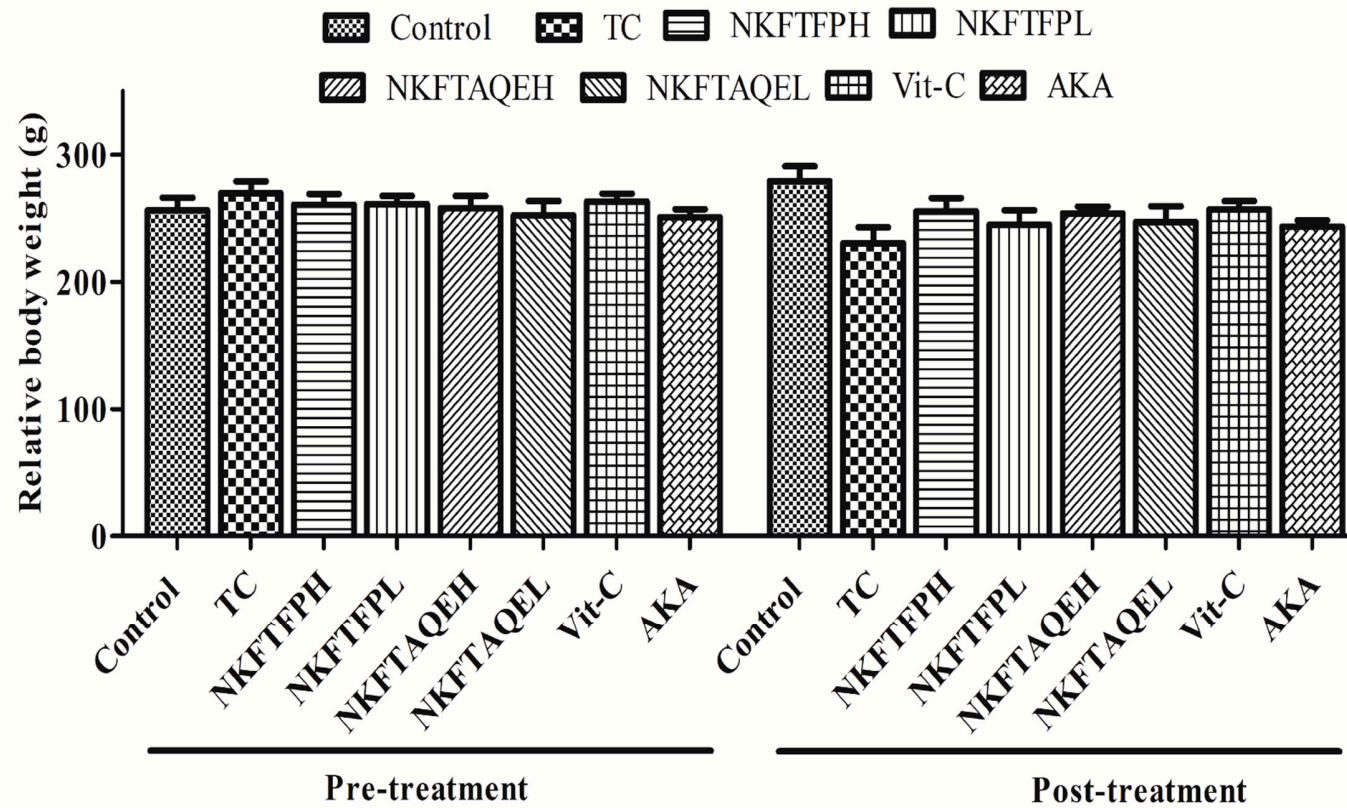

**Figure S1:** Assessment of pre-treatment and post-treatment relative body weight. The statistical representation were made as Mean  $\pm$  SD (n=6) using One-way ANOVA followed by Tukey test. The comparisons were made to control and toxic, toxic to drug-treated groups. The significance level was observed at  $p < 0.05$ .
